# Supplementary material for: Evolutionary Trade-Offs Underlie the Multi-faceted Virulence of Staphylococcus aureus
Source: PLoS Biol. 2015 Sep 2;13(9):e1002229. doi: 10.1371/journal.pbio.1002229 (PMC4558032; doi:10.1371/journal.pbio.1002229)
Supplement: S1 Data — (XLSX) [file pbio.1002229.s001.xlsx]

## Sheet: Single patient collection
Sample time point	Isolate	Mean T2 cell death (%)	95% confidence intervals
ENC1	384.16	96.735	2.4216
	384.21	97.49	1.40705
	384.22	98.415	0.40897
	384.45	97.01	2.74781
	384.56	92.7217	5.72189
	384.57	94.73	2.82988
	384.59	93.94	5.04206
	384.62	98.9117	0.457606
	384.79	90.6683	4.01211
	384.81	95.6267	4.1837
	384.86	96.58	2.05414
	384.89	97.3883	1.67167
ENC2	384.27	92.0567	3.53756
	384.32	98.0433	1.35492
	384.35	98.4033	0.94975
	384.36	96.9233	2.33378
	384.5	94.0033	5.61365
	384.54	95.06	4.43421
	384.63	96.7367	1.60863
	384.67	97.9333	1.12198
	384.68	96.4233	3.01583
	384.8	97.23	2.53098
	384.84	95.8033	4.06149
	384.88	97.8167	1.2573
ENC4	384.28	94.925	3.53787
	384.29	95.0967	3.44668
	384.38	98.3567	1.01647
	384.48	97.4	2.25585
	384.49	98.7667	0.901382
	384.51	97.2383	1.60439
	384.6	91.6333	7.44746
	384.61	98.11	1.79184
	384.66	98.3267	1.71731
	384.7	96.93	1.36089
	384.72	96.6183	2.36942
	384.73	95.4033	2.20178
ENC6	384.13	97.39	1.83786
	384.15	97.17	2.1691
	384.19	95.63	3.72678
	384.24	97.945	1.39078
	384.26	94.7117	4.36333
	384.39	96.87	2.34476
	384.41	98.3817	0.913038
	384.44	98.1433	0.993814
	384.46	99.0517	0.678443
	384.55	96.425	2.77214
	384.69	97.2567	1.4275
	384.74	92.6267	5.34041
ENC8	384.01	93.2433	5.62944
	384.04	89.775	9.28603
	384.05	96.5933	2.15213
	384.1	95.2767	4.02393
	384.14	94.32	3.01429
	384.17	97.6733	1.69901
	384.2	93.99	3.58644
	384.33	98.8417	1.19769
	384.53	96.7617	1.5794
	384.65	97.96	0.585993
	384.82	92.685	7.1029
	384.83	96.7517	3.19814
LNC12	384.02	7.87833	2.0138
	384.03	9.48333	3.40783
	384.08	22.8567	9.50249
	384.09	8.49833	6.32786
	384.11	15.255	6.90502
	384.23	21.2383	7.82856
	384.3	8.04	1.8911
	384.47	17.3317	7.76169
	384.75	16.125	6.07475
	384.76	40.2183	17.8741
	384.77	14.6483	7.9155
	384.87	13.4	5.3034
LBC15	384.12	17.8267	11.1869
	384.18	15.4617	10.0127
	384.25	11.5467	10.3494
	384.31	17.7817	3.79206
	384.37	18.59	5.24889
	384.42	12.295	5.49315
	384.43	7.54833	3.36457
	384.52	15.36	6.80832
	384.64	20.4933	7.95093
	384.71	10.4717	7.92248
	384.78	12.825	5.37815

## Sheet: USA300 THP1
		Isolate	Mean THP1 cell death (%)	95% confidence intervals		Site of isolation
		MR090	94.9	0.196006		Blood	(n=36)
		MR073	84.7333	2.4174		Blood
		MR021	84.0333	5.73166		Blood
		MR035	82.3	10.5867		Blood
		MR078	82.0667	8.77246		Blood
		MR025	81.2333	12.0748		Blood
		MR005	80.5333	4.98992		Blood
		MR083	80.4667	6.2817		Blood
		MR087	79.1	5.43658		Blood
		MR051	78.2	10.2942		Blood
		MR107	77.3333	8.75492		Blood
		MR030	76.6333	2.16594		Blood
		MR096	76.3	3.5281		Blood
		MR027	76.0333	9.36758		Blood
		MR047	73.3	21.8992		Blood
		MR019	73.2	8.36266		Blood
		MR110	73.1333	7.18688		Blood
		MR023	71.6	8.51968		Blood
		MR091	67.3667	7.70956		Blood
		MR077	67.1333	3.09981		Blood
		MR074	66.5333	4.58465		Blood
		MR072	66.3333	10.6647		Blood
		MR036	65.9667	16.8098		Blood
		MR039	65.7333	21.2074		Blood
		MR029	64.4667	14.6687		Blood
		MR084	64.1	8.51291		Blood
		MR031	61.4667	13.8247		Blood
		MR063	60.3667	5.6359		Blood
		MR065	48.2	6.48401		Blood
		MR007	37.3333	12.7048		Blood
		MR081	37.1	14.9406		Blood
		MR022	35.3	16.5463		Blood
		MR060	34.4333	10.8462		Blood
		MR064	13.2	4.1301		Blood
		MR018	5.23333	0.878996		Blood
		MR026	4.56667	1.24652		Blood
		USFL218	97.4	2.48188		SSTI	(n=60)
		USFL111	95.8333	0.558225		SSTI
		USFL158	95.1667	2.69305		SSTI
		USFL137	95.0667	1.6412		SSTI
		USFL139	94.4333	4.15226		SSTI
		USFL138	91.6333	3.69188		SSTI
		USFL113	91.3333	4.2483		SSTI
		USFL330	89.7667	5.67214		SSTI
		USFL159	89.4	2.20307		SSTI
		USFL164	88.4667	5.74839		SSTI
		USFL097	88.4	10.5192		SSTI
		USFL016	88.2667	8.91365		SSTI
		USFL020	87.4333	9.72179		SSTI
		USFL035	87.1	8.32275		SSTI
		USFL194	86.7	9.69056		SSTI
		USFL256	86.4333	8.52894		SSTI
		USFL162	86.4	7.12484		SSTI
		USFL018	86.3333	8.20445		SSTI
		USFL149	86.1667	7.63696		SSTI
		USFL223	85.8333	10.0138		SSTI
		USFL103	85.6667	10.8214		SSTI
		USFL160	85.3333	6.53744		SSTI
		USFL221	85.0667	11.5473		SSTI
		USFL136	84.7	12.0545		SSTI
		USFL069	84.1667	5.85434		SSTI
		USFL165	83.6667	10.4952		SSTI
		USFL220	83.2	11.0345		SSTI
		USFL274	83.1333	4.18911		SSTI
		USFL152	82.9667	9.34637		SSTI
		USFL198	82.7333	12.7461		SSTI
		USFL327	82.5	8.63093		SSTI
		USFL222	82.1333	11.1024		SSTI
		USFL056	80.5333	1.11645		SSTI
		USFL021	79.7667	11.8646		SSTI
		USFL273	79.5	7.64422		SSTI
		USFL110	79.4333	14.6749		SSTI
		USFL239	78.4	6.67955		SSTI
		USFL276	78.2667	3.85146		SSTI
		USFL339	77.8333	9.64509		SSTI
		USFL057	77.5667	11.3166		SSTI
		USFL250	77.2667	3.7264		SSTI
		USFL059	76.6667	6.7911		SSTI
		USFL219	74.5667	11.2945		SSTI
		USFL282	73.2	13.2102		SSTI
		USFL173	72.0333	7.31842		SSTI
		USFL255	71.4	4.19165		SSTI
		USFL095	70.9333	11.3713		SSTI
		USFL258	70.2667	14.301		SSTI
		USFL240	67.8	13.1869		SSTI
		USFL034	65.0667	14.6171		SSTI
		USFL277	64	5.72234		SSTI
		USFL237	63.5333	7.4571		SSTI
		USFL326	59.1333	12.9068		SSTI
		USFL319	56.3667	12.3729		SSTI
		USFL174	33.5	13.3763		SSTI
		USFL320	30.4667	15.7434		SSTI
		USFL039	19.5667	4.45		SSTI
		USFL341	19.3667	10.2032		SSTI
		USFL279	15.4667	10.9514		SSTI
		USFL036	10.9333	4.21197		SSTI
		USFL141	95.3	2.15903		Colonisation	(n=38)
		USFL082	93.8667	1.75435		Colonisation
		USFL008	91.2333	6.06493		Colonisation
		USFL224	91.2	7.28481		Colonisation
		USFL182	87.8333	3.39555		Colonisation
		USFL009	86.7	11.4127		Colonisation
		USFL077	86.6333	6.68753		Colonisation
		USFL130	86.6	9.29599		Colonisation
		USFL012	86.2	7.60728		Colonisation
		USFL119	85.3667	11.7736		Colonisation
		USFL200	85.2333	9.61983		Colonisation
		USFL166	85.2	3.25826		Colonisation
		USFL225	84.8333	12.9425		Colonisation
		USFL263	83.9667	3.99988		Colonisation
		USFL093	83.2333	7.8731		Colonisation
		USFL156	82.1667	5.94658		Colonisation
		USFL267	82.1	7.85573		Colonisation
		USFL215	82.0333	8.28367		Colonisation
		USFL074	80.6333	8.89064		Colonisation
		USFL243	79.2333	3.04983		Colonisation
		USFL211	79.0667	9.07102		Colonisation
		USFL153	78.2667	4.21349		Colonisation
		USFL063	77.6	9.18721		Colonisation
		USFL167	76.4333	8.14807		Colonisation
		USFL269	76.1333	7.38462		Colonisation
		USFL028	75.3	13.0698		Colonisation
		USFL259	75.1667	7.88042		Colonisation
		USFL061	74.2667	14.4873		Colonisation
		USFL248	73.3667	7.29739		Colonisation
		USFL271	69.4	9.87125		Colonisation
		USFL230	68.0667	14.5768		Colonisation
		USFL303	67.4	4.96376		Colonisation
		USFL302	54.3	16.4474		Colonisation
		USFL231	53.7667	8.06275		Colonisation
		USFL304	28.8333	1.99353		Colonisation
		USFL168	19.6	15.4861		Colonisation
		USFL272	13.5667	8.08654		Colonisation
		USFL042	11.5333	5.0359		Colonisation

## Sheet: USA300 T cell
		Isolate	Mena T2 cell death (%)	95% confidence intervals
	Blood	MR090	89.9333	4.95903
		MR047	88.4	5.00103
		MR073	81.4333	8.31916
		MR035	80.9	6.4424
		MR025	76.2	9.33928
		MR027	76.1333	10.3694
		MR036	75	8.52343
		MR087	73.6333	13.2403
		MR110	72.1	3.7855
		MR074	70.4333	15.2214
		MR021	70.2667	6.40585
		MR107	70.2	11.2773
		MR019	69.9333	1.86062
		MR072	68.7667	19.0977
		MR078	66.9	11.9113
		MR096	66.2667	5.45579
		MR083	65.4333	1.54473
		MR023	65.3667	3.39555
		MR039	64.6	8.13916
		MR091	64.1	4.88182
		MR030	63.7	4.92881
		MR051	62.4	14.2195
		MR005	58.1333	7.07463
		MR084	56.7333	8.99802
		MR031	49.5333	11.9769
		MR063	48.9333	11.9249
		MR077	48.8	9.74985
		MR029	45.4333	9.49656
		MR060	38	10.2655
		MR065	35.0667	8.4247
		MR022	32.0333	8.14807
		MR007	27.4667	8.46942
		MR081	22.8	10.5922
		MR026	11.9	5.55887
		MR018	11.5	5.48232
		MR064	10.7333	2.55142
	SSTI	USFL097	99.1667	0.68212
		USFL139	98.9667	1.18867
		USFL152	98.9333	1.79761
		USFL330	98.7333	0.397419
		USFL103	98.4	0.792148
		USFL113	98.4	1.66701
		USFL137	98.3333	1.81533
		USFL136	98.2667	2.45942
		USFL218	98.2667	0.770291
		USFL111	98.2	0.986541
		USFL223	97.9333	1.02682
		USFL276	97.5333	0.623259
		USFL110	96.9	1.6899
		USFL256	96.8	1.53085
		USFL327	96.7667	2.10294
		USFL138	96.7	5.24598
		USFL057	96.6	3.23855
		USFL059	96.4667	3.58273
		USFL194	96.0333	4.36721
		USFL149	95.9333	3.35762
		USFL273	95.9	3.85589
		USFL255	95.0667	3.44423
		USFL198	94.9667	2.27551
		USFL339	94.6333	0.770291
		USFL250	94.4333	2.39077
		USFL274	94.1	1.74214
		USFL221	94.0667	2.35841
		USFL056	93.6	5.74244
		USFL277	93.5333	1.71746
		USFL326	92.9667	2.33659
		USFL095	92.3333	4.53551
		USFL164	92.1	4.27784
		USFL158	90.9667	1.6373
		USFL282	90.5667	4.34958
		USFL222	90.1	1.89021
		USFL258	89.4333	5.14284
		USFL069	89.1667	8.20133
		USFL220	88.5667	1.53642
		USFL239	88.2667	9.36006
		USFL159	87.5667	3.57199
		USFL160	86.7667	6.80334
		USFL237	86.2	4.0217
		USFL165	85.8333	6.2449
		USFL018	85.5333	8.43382
		USFL240	82.1333	6.57553
		USFL020	81.9	3.4343
		USFL162	81.0333	11.0614
		USFL219	80.3	4.02807
		USFL016	79.9667	6.67795
		USFL319	78.0333	7.2366
		USFL035	70.7333	7.38462
		USFL039	69.8	2.37644
		USFL021	69.2333	11.7409
		USFL174	64.2333	9.68021
		USFL173	62.8	8.33505
		USFL320	60.3	12.4896
		USFL034	53.7667	9.50937
		USFL279	52.4333	6.95506
		USFL036	50.5667	7.38115
		USFL341	49.1667	3.28241
	Colonisation	USFL141	99.3333	0.753483
		USFL224	99.0667	0.510285
		USFL077	98.7	0.49327
		USFL119	98.5333	1.1994
		USFL130	98.3	2.50243
		USFL156	97.9333	2.3118
		USFL082	97.9	1.89021
		USFL269	97.3333	1.92822
		USFL074	96.9667	1.36424
		USFL267	96.2667	1.53642
		USFL061	95.8	3.7855
		USFL182	95.1667	4.17686
		USFL093	95.1	4.72993
		USFL200	94.4	2.15012
		USFL248	94	2.85613
		USFL243	93.5	3.73955
		USFL259	93.4	2.94009
		USFL213	92.5	1.30507
		USFL263	91.8333	3.44423
		USFL225	90.5333	4.72903
		USFL303	90.4667	3.01393
		USFL211	89.0667	7.78642
		USFL153	88.9333	8.55967
		USFL063	88.1	10.1929
		USFL231	87.0667	4.82287
		USFL009	85.9	5.39046
		USFL230	85.5333	4.18911
		USFL166	84.5	4.53927
		USFL271	83.6667	11.1018
		USFL008	80.7667	8.24804
		USFL302	80.1	3.45289
		USFL012	75.8	5.65367
		USFL028	73.3667	6.35366
		USFL304	63.9333	11.236
		USFL167	62.3	8.67164
		USFL042	46.4333	4.42692
		USFL169	44.6	1.77851
		USFL272	41	11.4127
