# Supplementary material for: Evolutionary Trade-Offs Underlie the Multi-faceted Virulence of Staphylococcus aureus
Source: PLoS Biol. 2015 Sep 2;13(9):e1002229. doi: 10.1371/journal.pbio.1002229 (PMC4558032; doi:10.1371/journal.pbio.1002229)
Supplement: S5 Data — (XLSX) [file pbio.1002229.s005.xlsx]

## Sheet: Supp Fig 1a
Treatment	Mean T2 cell death (%)	95% Confidence intervals
8325-4	91.8	3.56601
8325-4 Δhla	68.6667	8.3353
8325-4 Δhlb	81.8333	4.28432
LAC	99	0.63007
LACΔhld	77.5	2.45073
LACΔpvl	97.2333	1.86749
Newman	54.7667	5.604
NewmanΔhlg	20.4667	11.1283
NewmanΔlukAB	56.2667	8.56938
NewmanΔlukDE	58.2333	9.61916
PSMα1	82.1333	2.93778
PSMα2	90.1833	2.64109
PSMα3	89	2.78349
PSMα4	15.0117	2.03029
PSMβ1	8.01667	1.83691
PSMβ2	4.5	1.07477

## Sheet: Supp Fig 1b
Toxicity	Isolate	mean neutrophil cell death (%)			mean T2 cell death (%)
High	384.21	56.5			97.49
High	384.22	44.6			98.415
High	384.45	59.6			97.01
High	384.72	62.6			96.6183
High	384.56	60.4			92.7217
High	384.57	73			94.73
Low	384.12	16.6			17.8267
Low	384.18	11.6			15.4617
Low	384.25	13.1			11.5467
Low	384.31	17.7			17.7817
Low	384.37	14			18.59
Low	384.42	10			12.295
